# Supplementary material for: A supervised learning approach for taxonomic classification of core-photosystem-II genes and transcripts in the marine environment
Source: PubMed Central journal article supplement (PMC2696472; doi:10.1186/1471-2164-10-229), 2009-05-16
Supplement: 1471-2164-10-229-S4.pdf [file 1471-2164-10-229-S4.pdf]

Table S4: Summary of the MgFC classifier results tested on an independent data from [1], using partial fragments

| <b>Sequence Length</b> | <b>Number of runs</b> | <b>Fraction of sequences with confirmed results*</b> | <b>Standard deviation</b> |
|------------------------|-----------------------|------------------------------------------------------|---------------------------|
| 400                    | 25                    | 0.85                                                 | 0.03                      |
| 300                    | 30                    | 0.75                                                 | 0.04                      |
| 200                    | 50                    | 0.72                                                 | 0.04                      |
| 100                    | 100                   | 0.63                                                 | 0.05                      |

\* Sequences were considered confirmed only when both our classifiers converged and the prediction results fitted the original prediction.

#### Reference

1. Chenard C, Suttle CA: **Phylogenetic diversity of sequences of cyanophage photosynthetic gene psbA in marine and freshwaters**. *Appl Environ Microbiol* 2008, **74**(17):5317-5324.
