# Supplementary material for: A supervised learning approach for taxonomic classification of core-photosystem-II genes and transcripts in the marine environment
Source: PubMed Central journal article supplement (PMC2696472; doi:10.1186/1471-2164-10-229), 2009-05-16

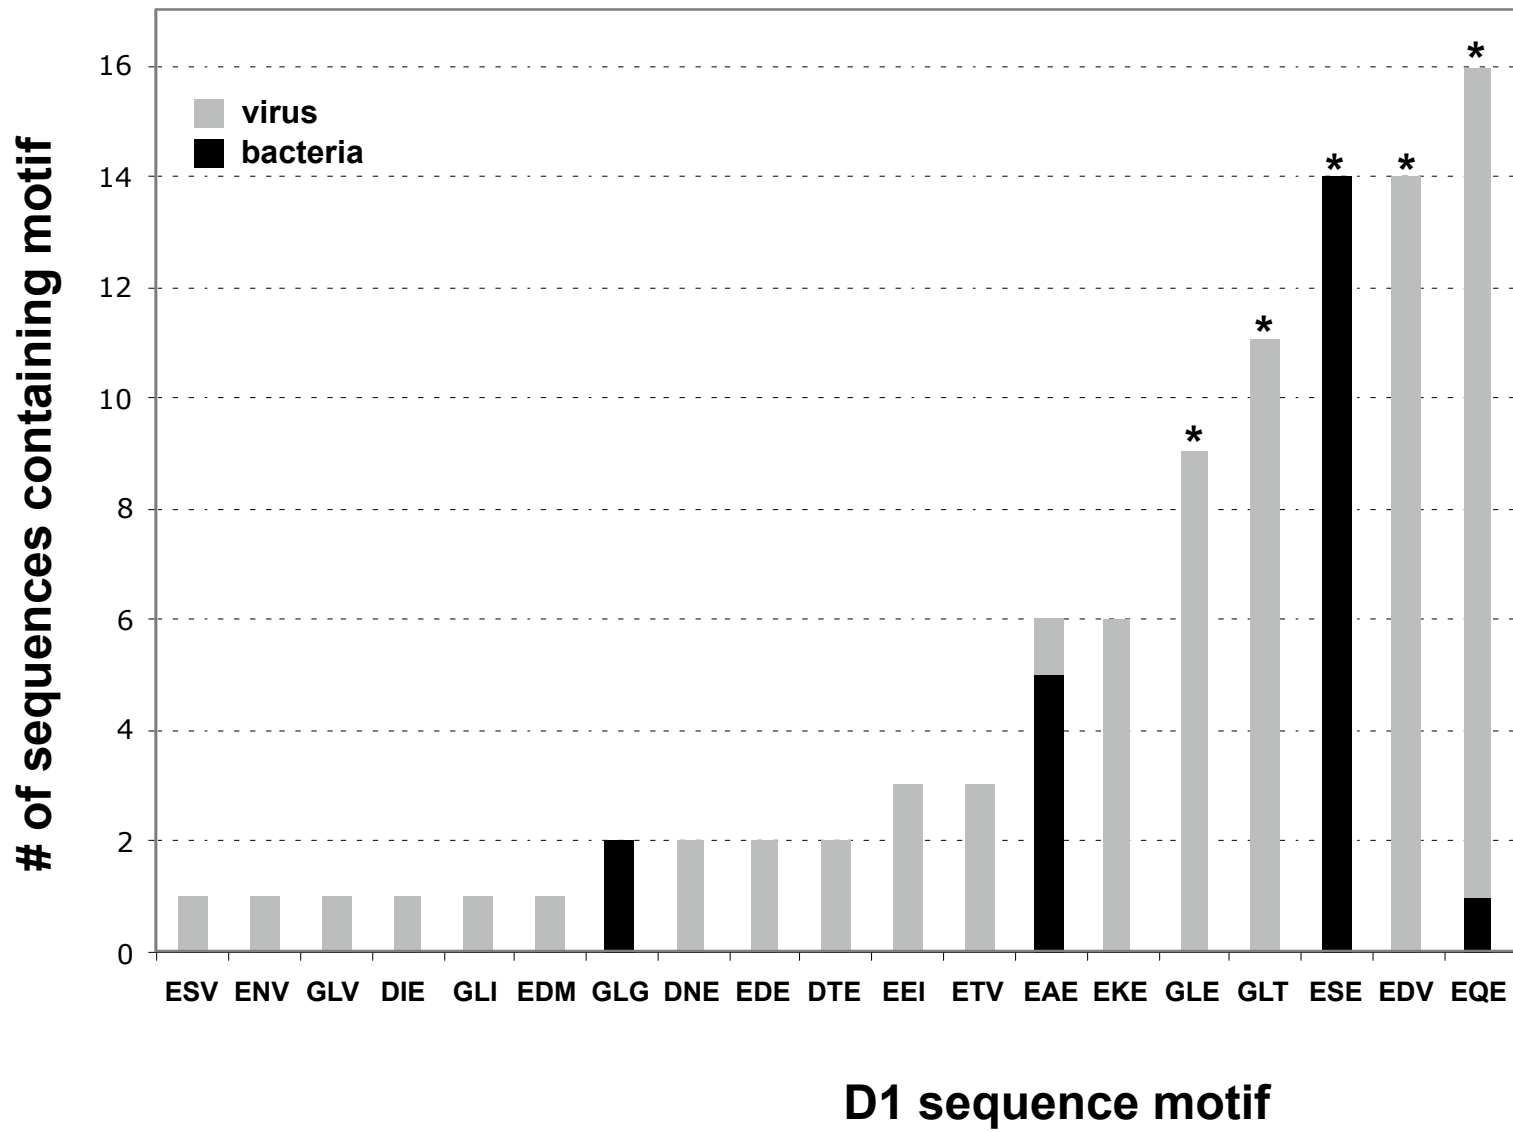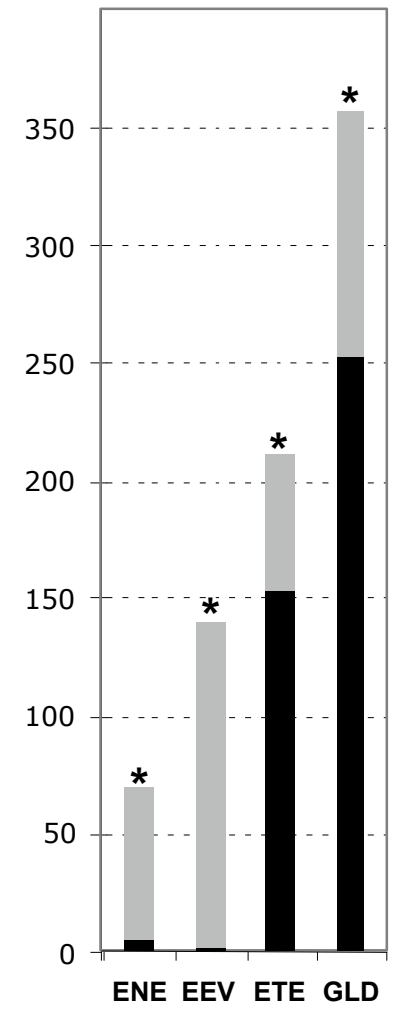

Supplement: 1471-2164-10-229-S6.pdf [file 1471-2164-10-229-S6.pdf]
