# Supplementary material for: A supervised learning approach for taxonomic classification of core-photosystem-II genes and transcripts in the marine environment
Source: PubMed Central journal article supplement (PMC2696472; doi:10.1186/1471-2164-10-229), 2009-05-16
Supplement: 1471-2164-10-229-S7.pdf [file 1471-2164-10-229-S7.pdf]

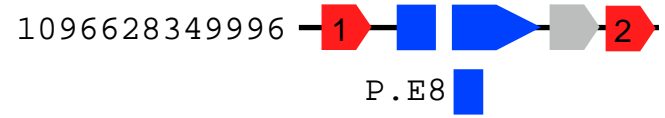

1096628349996 ETSEKESLNNGYKFGQEE  
 P.E8 SAMHGSLVTSSLVRETSEKESLNNGYKFGQEE  
 EN138731 SAMHGSLVTSSLVRETTEKESLNYGYKFGQEE
